# Supplementary material
Source: PubMed Central journal article supplement (PMC5166526)
Supplement: jcav07p2179s1.pdf [file jcav07p2179s1.pdf]

Table S1 Allele and genotype frequencies of single SNP association analysis in both stages

| SNP ID              | Allele Freq (%) |            | <i>P</i> -value | Genotype Freq (%) |            |            | <i>P</i> -value | HWE<br><i>P</i> -value |
|---------------------|-----------------|------------|-----------------|-------------------|------------|------------|-----------------|------------------------|
| The Discovery Stage |                 |            |                 |                   |            |            |                 |                        |
| rs2165408           | G               | A          |                 | GG                | GA         | AA         |                 |                        |
| OS                  | 416(73.24)      | 152(26.76) | 0.492190        | 153(53.87)        | 110(38.73) | 21(7.39)   | 0.787392        | 0.841                  |
| CTR                 | 1465(74.67)     | 497(25.33) |                 | 548(55.86)        | 369(37.61) | 64(6.52)   |                 | 0.859                  |
| rs7871477           | T               | G          |                 | TT                | TG         | GG         |                 |                        |
| OS                  | 404(71.13)      | 164(28.87) | 0.592003        | 143(50.35)        | 118(41.55) | 23(8.1)    | 0.857740        | 0.845                  |
| CTR                 | 1418(72.27)     | 544(27.73) |                 | 512(52.19)        | 394(40.16) | 75(7.65)   |                 | 0.947                  |
| rs7867176           | A               | G          |                 | AA                | AG         | GG         |                 |                        |
| OS                  | 386(67.96)      | 182(32.04) | 0.902908        | 133(46.83)        | 120(42.25) | 31(10.92)  | 0.857928        | 0.616                  |
| CTR                 | 1328(67.69)     | 634(32.31) |                 | 448(45.67)        | 432(44.04) | 101(10.3)  |                 | 0.834                  |
| rs1544195           | G               | A          |                 | GG                | GA         | AA         |                 |                        |
| OS                  | 518(91.2)       | 50(8.8)    | 0.487527        | 237(83.45)        | 44(15.49)  | 3(1.06)    | 0.547779        | 0.555                  |
| CTR                 | 1807(92.1)      | 155(7.9)   |                 | 833(84.91)        | 141(14.37) | 7(0.71)    |                 | 0.700                  |
| rs7874112           | A               | G          |                 | AA                | AG         | GG         |                 |                        |
| OS                  | 411(72.36)      | 157(27.64) | 0.390609        | 148(52.11)        | 115(40.49) | 21(7.39)   | 0.684789        | 0.836                  |
| CTR                 | 1455(74.16)     | 507(25.84) |                 | 539(54.94)        | 377(38.43) | 65(6.63)   |                 | 0.933                  |
| rs7850937           | A               | G          |                 | AA                | AG         | GG         |                 |                        |
| OS                  | 313(55.11)      | 255(44.89) | 0.588963        | 88(30.99)         | 137(48.24) | 59(20.77)  | 0.759184        | 0.673                  |
| CTR                 | 1056(53.82)     | 906(46.18) |                 | 282(28.75)        | 492(50.15) | 207(21.1)  |                 | 0.779                  |
| rs10965163          | C               | T          |                 | CC                | CT         | TT         |                 |                        |
| OS                  | 529(93.13)      | 39(6.87)   | 0.234158        | 247(86.97)        | 35(12.32)  | 2(0.7)     | 0.220392        | 0.540                  |
| CTR                 | 1797(91.59)     | 165(8.41)  |                 | 824(84)           | 149(15.19) | 8(0.82)    |                 | 0.660                  |
| rs3802393           | G               | A          |                 | GG                | GA         | AA         |                 |                        |
| OS                  | 441(77.64)      | 127(22.36) | 0.474922        | 173(60.92)        | 95(33.45)  | 16(5.63)   | 0.709715        | 0.538                  |
| CTR                 | 1495(76.2)      | 467(23.8)  |                 | 571(58.21)        | 353(35.98) | 57(5.81)   |                 | 0.802                  |
| rs7039105           | T               | G          |                 | TT                | TG         | GG         |                 |                        |
| OS                  | 412(72.54)      | 156(27.46) | 0.498838        | 152(53.52)        | 108(38.03) | 24(8.45)   | 0.679977        | 0.443                  |
| CTR                 | 1451(73.96)     | 511(26.04) |                 | 538(54.84)        | 375(38.23) | 68(6.93)   |                 | 0.809                  |
| rs4977734           | C               | A          |                 | CC                | CA         | AA         |                 |                        |
| OS                  | 301(52.99)      | 267(47.01) | 0.818345        | 78(27.46)         | 145(51.06) | 61(21.48)  | 0.926271        | 0.676                  |
| CTR                 | 1029(52.45)     | 933(47.55) |                 | 269(27.42)        | 491(50.05) | 221(22.53) |                 | 0.915                  |
| rs7047648           | G               | A          |                 | GG                | GA         | AA         |                 |                        |
| OS                  | 337(59.33)      | 231(40.67) | 0.444324        | 98(34.51)         | 141(49.65) | 45(15.85)  | 0.688779        | 0.628                  |
| CTR                 | 1199(61.11)     | 763(38.89) |                 | 366(37.31)        | 467(47.6)  | 148(15.09) |                 | 0.961                  |
| rs7047899           | C               | T          |                 | CC                | CT         | TT         |                 |                        |
| OS                  | 458(80.63)      | 110(19.37) | 0.228214        | 186(65.49)        | 86(30.28)  | 12(4.23)   | 0.449693        | 0.608                  |
| CTR                 | 1536(78.29)     | 426(21.71) |                 | 602(61.37)        | 332(33.84) | 47(4.79)   |                 | 0.888                  |
| rs4129861           | C               | T          |                 | CC                | CT         | TT         |                 |                        |
| OS                  | 526(92.61)      | 42(7.39)   | 0.394336        | 243(85.56)        | 40(14.08)  | 1(0.35)    | 0.471236        | 0.632                  |
| CTR                 | 1795(91.49)     | 167(8.51)  |                 | 822(83.79)        | 151(15.39) | 8(0.82)    |                 | 0.714                  |

|                      |             |            |          |            |            |            |          |       |
|----------------------|-------------|------------|----------|------------|------------|------------|----------|-------|
| rs10117507           | G           | A          |          | GG         | GA         | AA         |          |       |
| OS                   | 309(54.4)   | 259(45.6)  | 0.468752 | 82(28.87)  | 145(51.06) | 57(20.07)  | 0.731992 | 0.624 |
| CTR                  | 1101(56.12) | 861(43.88) |          | 307(31.29) | 487(49.64) | 187(19.06) |          | 0.803 |
| rs4977738            | A           | G          |          | AA         | AG         | GG         |          |       |
| OS                   | 387(68.13)  | 181(31.87) | 0.701542 | 133(46.83) | 121(42.61) | 30(10.56)  | 0.908389 | 0.751 |
| CTR                  | 1320(67.28) | 642(32.72) |          | 445(45.36) | 430(43.83) | 106(10.81) |          | 0.889 |
| The Validation Stage |             |            |          |            |            |            |          |       |
| rs2165408            | G           | A          |          | GG         | GA         | AA         |          |       |
| OS                   | 158(73.15)  | 58(26.85)  | 0.591708 | 59(54.63)  | 40(37.04)  | 9(8.33)    | 0.816402 | 0.552 |
| CTR                  | 894(74.87)  | 300(25.13) |          | 337(56.45) | 220(36.85) | 40(6.7)    |          | 0.615 |
| rs7871477            | T           | G          |          | TT         | TG         | GG         |          |       |
| OS                   | 155(71.76)  | 61(28.24)  | 0.776309 | 56(51.85)  | 43(39.81)  | 9(8.33)    | 0.938303 | 0.854 |
| CTR                  | 868(72.7)   | 326(27.3)  |          | 315(52.76) | 238(39.87) | 44(7.37)   |          | 0.917 |
| rs7867176            | A           | G          |          | AA         | AG         | GG         |          |       |
| OS                   | 148(68.52)  | 68(31.48)  | 0.843943 | 52(48.15)  | 44(40.74)  | 12(11.11)  | 0.891433 | 0.563 |
| CTR                  | 810(67.84)  | 384(32.16) |          | 276(46.23) | 258(43.22) | 63(10.55)  |          | 0.814 |
| rs1544195            | G           | A          |          | GG         | GA         | AA         |          |       |
| OS                   | 197(91.2)   | 19(8.8)    | 0.772918 | 90(83.33)  | 17(15.74)  | 1(0.93)    | 0.809553 | 0.844 |
| CTR                  | 1096(91.79) | 98(8.21)   |          | 503(84.25) | 90(15.08)  | 4(0.67)    |          | 0.991 |
| rs7874112            | A           | G          |          | AA         | AG         | GG         |          |       |
| OS                   | 158(73.15)  | 58(26.85)  | 0.647643 | 57(52.78)  | 44(40.74)  | 7(6.48)    | 0.876362 | 0.700 |
| CTR                  | 891(74.62)  | 303(25.38) |          | 331(55.44) | 229(38.36) | 37(6.2)    |          | 0.755 |

OS: osteosarcoma; CTR: control.
